RESEARCH ARTICLE

# Historical and ecological drivers of the spatial pattern of Chondrichthyes species richness in the Mediterranean Sea

María José Meléndez<sup>1,2☯</sup>, José Carlos Báez<sup>3,4☯\*</sup>, José Miguel Serna-Quintero<sup>1</sup>, Juan Antonio Camiñas<sup>1</sup>, Ignacio de Loyola Fernández<sup>2</sup>, Raimundo Real<sup>2</sup>, David Macías<sup>1</sup>

**1** Centro Oceanográfico de Málaga, Instituto Español de Oceanografía (IEO), Fuengirola, Spain, **2** Departamento de Biología Animal, Universidad de Málaga, Málaga, Spain, **3** Centro Oceanográfico de Canarias, Instituto Español de Oceanografía (IEO), Santa Cruz de Tenerife, Spain, **4** Facultad de Ciencias de la Salud, Universidad Autónoma de Chile, Santiago de Chile, Chile

☯ These authors contributed equally to this work.

\* [granbaez\\_29@hotmail.com](mailto:granbaez_29@hotmail.com)

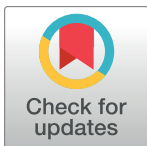

## Abstract

Chondrichthyes, which include Elasmobranchii (sharks and batoids) and Holocephali (chimaeras), are a relatively small group in the Mediterranean Sea (89 species) playing a key role in the ecosystems where they are found. At present, many species of this group are threatened as a result of anthropogenic effects, including fishing activity. Knowledge of the spatial distribution of these species is of great importance to understand their ecological role and for the efficient management of their populations, particularly if affected by fisheries. This study aims to analyze the spatial patterns of the distribution of Chondrichthyes species richness in the Mediterranean Sea. Information provided by the studied countries was used to model geographical and ecological variables affecting the Chondrichthyes species richness. The species were distributed in 16 Operational Geographical Units (OGUs), derived from the Geographical Sub-Areas (GSA) adopted by the General Fisheries Commission of the Mediterranean Sea (GFCM). Regression analyses with the species richness as a target variable were adjusted with a set of environmental and geographical variables, being the model that links richness of Chondrichthyes species with distance to the Strait of Gibraltar and number of taxonomic families of bony fishes the one that best explains it. This suggests that both historical and ecological factors affect the current distribution of Chondrichthyes within the Mediterranean Sea.

## OPEN ACCESS

**Citation:** Meléndez MJ, Báez JC, Serna-Quintero JM, Camiñas JA, Fernández IdL, Real R, et al. (2017) Historical and ecological drivers of the spatial pattern of Chondrichthyes species richness in the Mediterranean Sea. PLoS ONE 12(4): e0175699. <https://doi.org/10.1371/journal.pone.0175699>

**Editor:** Athanassios C. Tsikliras, Aristotle University of Thessaloniki, GREECE

**Received:** November 21, 2016

**Accepted:** March 30, 2017

**Published:** April 13, 2017

**Copyright:** © 2017 Meléndez et al. This is an open access article distributed under the terms of the [Creative Commons Attribution License](https://creativecommons.org/licenses/by/4.0/), which permits unrestricted use, distribution, and reproduction in any medium, provided the original author and source are credited.

**Data Availability Statement:** All relevant data are within the paper and its Supporting Information files.

**Funding:** The authors received no specific funding for this work.

**Competing interests:** The authors have declared that no competing interests exist.

## Introduction

Species diversity gradients have been identified since the late 19<sup>th</sup> century [1] affecting marine species richness [2]. Explaining the spatial trends of species distribution is of major importance in any biogeographic study, as they affect a set of species in a similar way. Marine species richness increases from the poles to the equator (latitudinal diversity gradient), similarly to what occurs in the terrestrial environment [2]. The climatic stability of the tropical seas has been

proposed as the main mechanism explaining this pattern of species diversity [2]. Longitudinal distribution gradients in species richness in the marine environment have also been observed, and they are usually linked to historical processes [2]. Although the existence of these diversity patterns has been widely accepted, there are currently many ecosystems and specific environments for which the existence of a geographic trend in species richness is unknown [2]. Extinction-recolonization processes associated to geographical features have been used to explain the gradients observed in peninsulas (piece of land that is bordered by water but connected to mainland through one isthmus) [3–5], although these kinds of processes have never been linked before to explain analogous marine spatial patterns of species richness.

The Mediterranean Sea is a semi-closed sea, where oceanographic phenomena occur on a relatively small scale [6]. This sea could be seen as a marine “peninsula” as it was bordered by land, and only connected to the Atlantic Ocean through the Strait of Gibraltar, until the construction of the artificial Suez Canal. Moreover, during the Messinian salinity crisis [7–8] it suffered a process of extinction followed by a later recolonization. Thus, during this period, the Mediterranean Sea became a concentration basin, i.e., the contributions of rivers did not balance the evaporation losses [6]. Therefore, once interrupted the connection with the Atlantic Ocean, a process of gradual and almost complete desiccation of the Mediterranean Sea occurred in less than a thousand years. Two hundred thousand years later, the Atlantic water flow refilled the Mediterranean basin, in what is called the Zanclean flood.

Chondrichthyes, which include Elasmobranchii (sharks, rays, skates and sawfish) and Holocephali (chimaeras), have been successful in diverse ecosystems for over 400 million years. Despite their success, they are currently under threat as a result of human activities, including fishery [9]. Chondrichthyes play a key role in the ecosystems where they are found [10], many of them as apical predators. Some Elasmobranchii species are facing population declines in their distribution area [11–12]. Therefore, it is important to improve the knowledge of their spatial patterns and distribution areas. Recent studies have found that Elasmobranchii show a longitudinal gradient in the Mediterranean Sea [13]. However, no more than five batoid species could be considered Mediterranean endemic species [14]: the Maltese skate (*Leucoraja melitensis*), the speckled skate (*Raja polystigma*), the Mediterranean starry ray (*Raja asterias*), the rough ray (*Raja radula*), and the giant devilray (*Mobula mobular*).

The Suez Canal is an artificial sea-level waterway in Egypt, connecting the Mediterranean Sea to the Red Sea through the Isthmus of Suez. It was constructed by Ferdinand de Lesseps towards 1869. Since then, many alien species, considered as Lessepsian invasive species, have become established in the Mediterranean Sea making use of this pathway. Four Chondrichthyes are considered Lessepsian species [15–16]: *Carcharhinus altimus*, *Carcharhinus melanopterus*, *Himantura uarnak* and *Torpedo sinuspersici*, although the status of *Carcharhinus altimus* as Lessepsian species has been questioned [17]. On the other hand, it is possible to consider as vagrant or visitor species in the Mediterranean Sea the following: *Carcharhinus falci-formis* [17], *Pristis pristis* [18], *Pristis pectinata* [18] and *Hydrolagus mirabilis* [19].

The objective of the present study was to analyze the spatial patterns of the distribution of Chondrichthyes species in the Mediterranean Sea, and testing historical and ecological explanatory hypothesis of these patterns by using spatial distribution models.

## Material and methods

### Data source

The distribution of Chondrichthyes species recorded in local checklists is mainly referred to countries. For this reason, it is difficult to assign a species record to a point or local area. This issue has been solved by the General Fisheries Commission for the Mediterranean (GFCM,

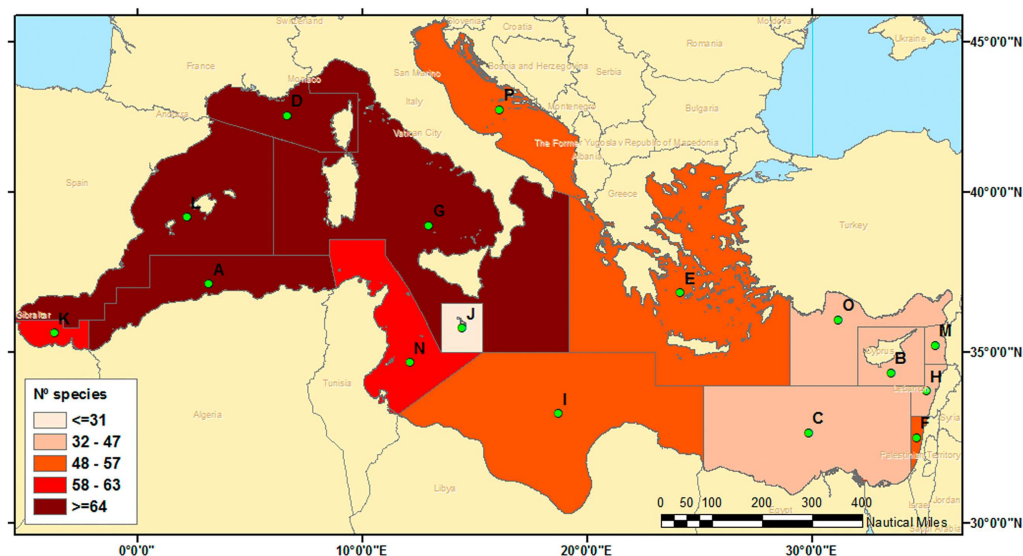

**Fig 1. Geographic distribution of the Operational Geographical Units (OGUs) considered in this study.** Green dots are the centroids of each OGU and the names of the countries designate the OGUs names.

<https://doi.org/10.1371/journal.pone.0175699.g001>

FAO) by adapting Res. GFCM/33/2009/2 (Establishment of Geographical Sub-Areas in the GFCM area). Geographical Sub-Areas (GSAs) have been defined according to multiple criteria, including the jurisdiction of each riparian country and distribution of fleets and fishing areas. GSAs were used in this study to facilitate the preparation of data. Likewise, the GFCM provides the Geographical Information System shapefiles. Nevertheless, the 30 Mediterranean GSAs defined by the GFCM (<http://www.fao.org/gfcm/data/map-geographical-subareas/en/>) were assembled into 16 Operational Geographical Units (OGUs) [19] by linking different GSAs of the same country, since most databases provide information about species presence in each country. The 16 OGUs, i.e., marine geographical areas, were built for operative reasons (see Fig 1 and Table 1).

General sources (i.e., compendia of records) were used to perform the list of Chondrichthyes species cited in the areas included in each OGU [17, 20–23]. Likewise, data from the distribution maps produced by the IUCN Shark Specialist Group (available on the website [www.redlist.org](http://www.redlist.org)) until October 2015 were assembled. Furthermore, an active search of updated citations from the last 35 years was performed for each record considered as dubious, and other new records (Table 2) (S1 Table). According to the synonyms, accepted names from Fishbase were used [21].

On the other hand, some records, i.e., *Sphyrna tudes* and *Galeocerdo cuvier* have been questioned. However, the remains of *G. cuvier* (deposited in the Museum Alborania of Malaga) were examined and they certainly correspond to *G. cuvier*. Moreover, recently was confirmed the presence of *G. cuvier* from Mediterranean Sea by captures of juveniles specimens in Libya [24]. Therefore, in this study, these citations have been considered as records of vagrant species.

## Methods and statistical analysis

The Chondrichthyes Species Richness (CSR) of each OGU was obtained from the total number of species present by OGU (S1 Table). Latitude and longitude of each OGU were calculated with a geographic information system (ArcGis 10.3 program). Centroid coordinates of each OGU were calculated and their values of latitude and longitude were inferred. These values were used to assess the existence of a geographical gradient in CSR.

**Table 1. Countries and Geographical Sub-Areas (GSAs) corresponding to each Operational Geographical Unit (OGUs).**

| OGUs | GSAs                                         | Countries                                                                     |
|------|----------------------------------------------|-------------------------------------------------------------------------------|
| A    | GSA 04                                       | Algeria                                                                       |
| B    | GSA 25                                       | Cyprus                                                                        |
| C    | GSA 26                                       | Egypt                                                                         |
| D    | GSA07, GSA08                                 | Francia and Monaco                                                            |
| E    | GSA 20, GSA22, GSA 23                        | Greece                                                                        |
| F    | GSA27                                        | Israel and Palestinian Territory                                              |
| G    | GSA09, GSA11,1, GSA11,2, GSA10, GSA16, GSA19 | South and West Italy                                                          |
| H    | GSA27                                        | Lebanon                                                                       |
| I    | GSA21                                        | Libya                                                                         |
| J    | GSA15                                        | Malta                                                                         |
| K    | GSA3                                         | Morocco                                                                       |
| L    | GSA01, GSA02, GSA05, GSA06                   | Spain                                                                         |
| M    | GSA27                                        | Syrian Arab Republic                                                          |
| N    | GSA12, GSA13, GSA14                          | Tunisia                                                                       |
| O    | GSA24                                        | Turkey Mediterranean                                                          |
| P    | GSA17, GSA18                                 | Albania, Bosnia and Herzegovina, Croatia, Montenegro, Slovenia and East Italy |

<https://doi.org/10.1371/journal.pone.0175699.t001>

The correlation between the CSR of each OGU with the latitude (abbreviated as LAT) and longitude (abbreviated as LON) of each OGU centroid (to assess the spatial gradient) [26–27] was tested.

Linear multiple regressions were performed to test monotonic responses of CSR predicted by several historical, ecological and environmental factors. The best fit among significant regressions, with different degrees of freedom in accordance with the highest F-value, was selected. The normality of variables was previously tested with the Shapiro-Wilk test [28]. Six variables were selected: Sea Surface Temperature (SST), Salinity in Depth (SD), the OGU Area (OAR), number of taxonomic Families of bony fishes per OGU (FAM), Distance from the centroid of each OGU to the Strait of Gibraltar (DISTG) and Distance from the centroid of each OGU to the Suez Channel (DISTS) (Table 3).

The variables, i.e., OAR, DISTG and DISTS, were calculated with ArcGIS spatial analysis tools (ArcGIS 10.3 program), while SST and SD were estimated from the data provided by NOAA (National Oceanic and Atmospheric Administration) [29]. They were referred to the mean between the years 2005–2010 for the available data. The number of taxonomic families of bony fishes per OGU (FAM) was obtained from Fishbase [21]. In a second step, the Lessepsian, vagrant, visitors, and highly migratory species were removed from the analysis. According to the specialist group of sharks of the International Commission for the Conservation of Atlantic Tunas (ICCAT), the Elasmobranchii species considered as pelagic, oceanic and highly migratory in the ICCAT Convention area are: *Carcharodon carcharias*, *Isurus paucus*, *Lamna nasus*, *Cetorhinus maximus*, *Alopias superciliosus*, *A. vulpinus*, *Carcharhinus falciformis*, *Sphyrna lewini*, *S. mokarran*, *S. zygaena*, *Pteroplatytrygon violacea* and *Mobula mobular* [30].

## Results

A total of 89 species of Chondrichthyes were recorded in the Mediterranean Sea, of which 49 are sharks, 38 are rays and 2 Holocephali species (*Chimaera monstrosa* and *Hydrolagus*

**Table 2. Chondrichthyes species recorded in the Mediterranean Sea, their occurrence at each Operational Geographical Units (OGUs) and IUCN status in a regional assessment.** Key: ~ Lessepsian invasive species; § Vagrant and visitors; \* Highly migratory species; & it presence is doubtful. CR, Critically Endangered; EN, Endangered; VU, Vulnerable; NT, Near Threatened; LC, Least Concern; NA, Not Assessed; DD, Data Deficient [25].

| Family         | Genus + Species                     | Authority                | Vernacular Name             | IUCN Region Global | IUCN Region Euro | IUCN Region MED | UGOs occurrence                                | % of occurrence |
|----------------|-------------------------------------|--------------------------|-----------------------------|--------------------|------------------|-----------------|------------------------------------------------|-----------------|
| Carcharhinidae | <i>Carcharhinus altimus</i> ~ §     | (Springer, 1950)         | Bignose shark               | DD                 | DD               | DD              | A, B, C, F, H, I, K, L, M, O                   | 62.5            |
| Carcharhinidae | <i>Carcharhinus brachyurus</i>      | (Günther, 1870)          | Bronze whaler shark         | NT                 | DD               | DD              | A, B, C, D, E, F, G, H, I, J, K, L, M, N, O, P | 100             |
| Carcharhinidae | <i>Carcharhinus brevipinna</i>      | (Müller & Henle, 1839)   | Spinner shark               | NT                 | NA               | NA              | A, B, C, D, E, F, G, H, I, J, K, L, M, N, O, P | 100             |
| Carcharhinidae | <i>Carcharhinus falciformis</i> * § | (Müller & Henle, 1839)   | Silky shark                 | NT                 | DD               | NA              | A, K, L, N                                     | 25              |
| Carcharhinidae | <i>Carcharhinus limbatus</i>        | (Müller & Henle, 1839)   | Blacktip shark              | NT                 | DD               | DD              | A, B, C, D, E, F, G, H, I, J, K, L, M, N, O, P | 100             |
| Carcharhinidae | <i>Carcharhinus melanopterus</i> ~  | (Quoy & Gaimard, 1824)   | Blacktip reef shark         | NT                 | NA               | NA              | C, F, G, J, N, O                               | 37.5            |
| Carcharhinidae | <i>Carcharhinus obscurus</i>        | (Lesueur, 1818)          | Dusky shark                 | VU                 | DD               | DD              | A, D, F, G, I, J, K, L, M, N                   | 62.5            |
| Carcharhinidae | <i>Carcharhinus plumbeus</i>        | (Nardo, 1827)            | Sandbar shark               | VU                 | EN               | EN              | A, B, C, D, E, F, G, H, I, J, K, L, M, N, O, P | 100             |
| Carcharhinidae | <i>Galeocerdo cuvier</i> §          | (Péron & Lesueur, 1822)  | <a href="#">Tiger shark</a> | NT                 | DD               | NA              | G, L                                           | 12.5            |
| Carcharhinidae | <i>Prionace glauca</i>              | (Linnaeus, 1758)         | Blue shark                  | NT                 | NT               | CR              | A, B, C, D, E, F, G, H, I, J, K, L, N, O, P    | 93.75           |
| Carcharhinidae | <i>Rhizoprionodon acutus</i> § &    | (Rüppell, 1837)          | Milk shark                  | LC                 | NA               | NA              | E, G                                           | 12.5            |
| Scyliorhinidae | <i>Galeus atlanticus</i>            | (Vaillant, 1888)         | Atlantic catshark           | NT                 | NT               | NT              | A, K, L                                        | 18.75           |
| Scyliorhinidae | <i>Galeus melastomus</i>            | Rafinesque, 1810         | Blackmouth catshark         | LC                 | LC               | LC              | A, B, C, D, E, F, G, H, I, J, K, L, M, N, O, P | 100             |
| Scyliorhinidae | <i>Scyliorhinus canicula</i>        | (Linnaeus, 1758)         | Smallspotted catshark       | LC                 | LC               | LC              | A, B, C, D, E, F, G, H, I, J, K, L, M, N, O, P | 100             |
| Family         | Genus + Species                     | Authority                | Vernacular Name             | IUCN Region Global | IUCN Region Euro | IUCN Region MED | UGOs occurrence                                | % of occurrence |
| Scyliorhinidae | <i>Scyliorhinus stellaris</i>       | (Linnaeus, 1758)         | Nursehound                  | NT                 | NT               | NT              | A, B, C, D, E, F, G, H, I, J, K, L, M, N, O, P | 100             |
| Sphyrnidae     | <i>Sphyrna lewini</i> * §           | (Griffith & Smith, 1834) | Scalloped hammerhead        | EN                 | DD               | NA              | A, D, G, K, L                                  | 31.25           |
| Sphyrnidae     | <i>Sphyrna mokarran</i> * §         | (Rüppell, 1837)          | Great hammerhead            | EN                 | DD               | NA              | A, B, C, D, E, G, I, K, L, M, N                | 68.75           |
| Sphyrnidae     | <i>Sphyrna tudes</i>                | (Valenciennes, 1822)     | Smalleye hammerhead         | VU                 | NA               | NA              | E, G, J, L, O, P                               | 37.5            |
| Sphyrnidae     | <i>Sphyrna zygaena</i> *            | (Linnaeus, 1758)         | Smooth hammerhead           | VU                 | DD               | CR              | A, B, C, D, E, F, G, H, I, J, K, L, M, N, O, P | 100             |
| Triakidae      | <i>Galeorhinus galeus</i>           | (Linnaeus, 1758)         | Tope shark                  | VU                 | VU               | VU              | A, B, C, D, E, F, G, H, I, J, K, L, M, N, O, P | 100             |

(Continued)

Table 2. (Continued)

| Triakidae      | <i>Mustelus asterias</i>        | Cloquet, 1819             | Starry smoothhound        | LC                 | NT               | VU              | A, B, C, D, E, F, G, H, I, J, K, L, M, N, O, P | 100             |
|----------------|---------------------------------|---------------------------|---------------------------|--------------------|------------------|-----------------|------------------------------------------------|-----------------|
| Triakidae      | <i>Mustelus mustelus</i>        | (Linnaeus, 1758)          | Smoothhound               | VU                 | VU               | VU              | A, B, C, D, E, F, G, H, I, J, K, L, M, N, O, P | 100             |
| Triakidae      | <i>Mustelus punctulatus</i>     | Risso, 1827               | Blackspot smoothhound     | DD                 | VU               | VU              | A, B, C, D, E, F, G, H, I, J, K, L, M, N, O, P | 93.75           |
| Hexanchidae    | <i>Heptranchias perlo</i>       | (Bonnaterre, 1788)        | Sharpnose sevengill shark | NT                 | DD               | DD              | A, B, C, D, E, F, G, H, I, J, K, L, M, N, O, P | 100             |
| Hexanchidae    | <i>Hexanchus griseus</i>        | (Bonnaterre, 1788)        | Bluntnose sixgill shark   | NT                 | LC               | LC              | A, B, C, D, E, F, G, H, I, J, K, L, M, N, O, P | 100             |
| Hexanchidae    | <i>Hexanchus nakamurai</i>      | Teng, 1962                | Bigeye sixgill shark      | DD                 | DD               | DD              | A, D, E, G, K, L, N, P                         | 50              |
| Alopiidae      | <i>Alopias superciliosus</i> *  | Lowe, 1841                | Bigeye thresher           | VU                 | EN               | EN              | A, B, C, D, E, F, G, H, I, J, K, L, M, N, O, P | 100             |
| Alopiidae      | <i>Alopias vulpinus</i> *       | (Bonnaterre, 1788)        | Thresher shark            | VU                 | EN               | EN              | A, B, C, D, E, F, G, H, I, J, K, L, M, N, O, P | 100             |
| Cetorhinidae   | <i>Cetorhinus maximus</i> *     | (Gunnerus, 1765)          | Basking shark             | VU                 | EN               | EN              | A, B, C, D, E, F, G, H, I, J, K, L, M, N, O, P | 100             |
| Lamnidae       | <i>Carcharodon carcharias</i> * | (Linnaeus, 1758)          | Great white shark         | VU                 | CR               | CR              | A, B, C, D, E, F, G, H, I, J, K, L, M, N, O, P | 100             |
| Lamnidae       | <i>Isurus oxyrinchus</i>        | Rafinesque, 1810          | Shortfin mako             | VU                 | DD               | CR              | A, B, C, D, E, F, G, H, I, J, K, L, M, N, O, P | 100             |
| Lamnidae       | <i>Isurus paucus</i> *          | Guitart, 1966             | Longfin mako              | VU                 | DD               | DD              | A, K, L                                        | 18.75           |
| Family         | Genus + Species                 | Authority                 | Vernacular Name           | IUCN Region Global | IUCN Region Euro | IUCN Region MED | UGOs occurrence                                | % of occurrence |
| Lamnidae       | <i>Lamna nasus</i> *            | (Bonnaterre, 1788)        | Porbeagle shark           | VU                 | CR               | CR              | A, B, C, D, E, F, G, H, I, J, K, L, M, N, O, P | 100             |
| Odontaspidae   | <i>Carcharias taurus</i>        | Rafinesque, 1810          | Sand tiger shark          | VU                 | CR               | CR              | A, B, D, E, G, H, I, J, K, L, M, N, O, P       | 87.5            |
| Odontaspidae   | <i>Odontaspis ferox</i>         | (Risso, 1810)             | Smalltooth sand tiger     | VU                 | CR               | CR              | A, B, C, D, E, F, G, H, I, J, K, L, M, N, O, P | 100             |
| Centrophoridae | <i>Centrophorus granulosus</i>  | (Bloch & Schneider, 1801) | Gulper shark              | NA                 | NA               | NA              | A, B, C, D, E, F, G, H, I, J, K, L, M, N, O, P | 100             |
| Centrophoridae | <i>Centrophorus uyato</i> &     | Rafinesque, 1810          | Little gulper shark       | DD                 | VU               | NA              | A, B, D, E, F, G, H, I, J, K, L, M, N, O, P    | 93.75           |
| Dalatiidae     | <i>Dalatias licha</i>           | (Bonnaterre, 1788)        | Kitefin shark             | NT                 | EN               | VU              | A, D, E, G, I, J, K, L, N, O, P                | 68.75           |
| Echinorhinidae | <i>Echinorhinus brucus</i>      | (Bonnaterre, 1788)        | Bramble shark             | DD                 | EN               | EN              | A, B, C, D, E, G, I, J, K, L, N, O, P          | 81.25           |
| Etmopteridae   | <i>Etmopterus spinax</i>        | (Linnaeus, 1758)          | Velvet belly              | LC                 | NT               | LC              | A, B, D, E, F, G, I, J, K, L, N, O, P          | 81.25           |

(Continued)



Table 2. (Continued)

| Oxynotidae   | <i>Oxynotus centrina</i>           | (Linnaeus, 1758)                           | Angular roughshark     | VU                 | VU               | CR              | A, B, C, D, E, F, G, H, I, J, K, L, M, N, O, P | 100             |
|--------------|------------------------------------|--------------------------------------------|------------------------|--------------------|------------------|-----------------|------------------------------------------------|-----------------|
| Somniosidae  | <i>Centroscymnus coelolepis</i>    | Barbosa du Bocage & de Brito Capello, 1864 | Portuguese dogfish     | NT                 | EN               | LC              | A, D, G, I, K, L, N                            | 43.75           |
| Somniosidae  | <i>Somniosus rostratus</i>         | (Risso, 1827)                              | Little sleeper shark   | DD                 | DD               | DD              | A, D, F, G, I, J, K, L, N                      | 56.25           |
| Squalidae    | <i>Squalus acanthias</i>           | Linnaeus, 1758                             | Spiny dogfish          | VU                 | EN               | EN              | A, B, C, D, E, F, G, H, I, J, K, L, M, N, O, P | 100             |
| Squalidae    | <i>Squalus blainville</i>          | (Risso, 1827)                              | Longnose spurdog       | DD                 | DD               | DD              | A, B, C, D, E, F, G, H, I, J, K, L, M, N, O, P | 100             |
| Squalidae    | <i>Squalus megalops</i>            | (MacLeay, 1881)                            | Shortnose spurdog      | DD                 | DD               | DD              | A, D, G, K, L, N                               | 37.5            |
| Squatinae    | <i>Squatina aculeata</i>           | Cuvier, 1829                               | Sawback angelshark     | CR                 | CR               | CR              | A, C, D, E, G, I, K, L, N, O                   | 62.5            |
| Squatinae    | <i>Squatina oculata</i>            | Bonaparte, 1840                            | Smoothback angelshark  | CR                 | CR               | CR              | A, B, C, D, E, F, G, H, I, J, K, L, M, N, O, P | 100             |
| Squatinae    | <i>Squatina squatina</i>           | (Linnaeus, 1758)                           | Angelshark             | CR                 | NA               | CR              | A, B, C, D, E, F, G, H, I, J, K, L, M, N, O, P | 100             |
| Family       | Genus + Species                    | Authority                                  | Vernacular Name        | IUCN Region Global | IUCN Region Euro | IUCN Region MED | UGOs occurrence                                | % of occurrence |
| Dasyatidae   | <i>Dasyatis centroura</i>          | (Mitchill, 1815)                           | Roughtail stingray     | LC                 | VU               | VU              | A, B, C, D, E, F, G, H, I, J, K, L, M, N, O, P | 100             |
| Dasyatidae   | <i>Dasyatis chrysonota</i> &       | (Smith, 1828)                              | Blue stingray          | LC                 | NA               | NA              | F, N                                           | 12.5            |
| Dasyatidae   | <i>Dasyatis marmorata</i>          | (Steindachner, 1892)                       | Marbled stingray       | DD                 | DD               | DD              | F, K, N, O                                     | 25              |
| Dasyatidae   | <i>Dasyatis pastinaca</i>          | (Linnaeus, 1758)                           | Common stingray        | DD                 | VU               | VU              | A, B, C, D, E, F, G, H, I, J, K, L, M, N, O, P | 100             |
| Dasyatidae   | <i>Dasyatis tortonesei</i>         | Capapé, 1975                               | Tortonese's stingray   | DD                 | VU               | VU              | A, B, C, D, E, F, G, H, I, K, L, M, N, O       | 87.5            |
| Dasyatidae   | <i>Himantura uarnak</i> ~          | (Forsskael, 1775)                          | Honeycomb whipray      | VU                 | NA               | NA              | C, F, H, O                                     | 25              |
| Dasyatidae   | <i>Pteroplatytrygon violacea</i> * | (Bonaparte, 1832)                          | Pelagic stingray       | LC                 | LC               | LC              | A, C, D, E, F, G, I, J, K, L, N, O, P          | 81.25           |
| Dasyatidae   | <i>Taeniura grabata</i>            | (Geoffroy Saint-Hilaire, 1817)             | Round fantail stingray | DD                 | DD               | DD              | A, C, F, G, H, I, M, N, O                      | 56.25           |
| Gymnuridae   | <i>Gymnura altavela</i>            | (Linnaeus, 1758)                           | Spiny butterfly ray    | VU                 | CR               | CR              | A, B, C, D, E, F, G, H, I, J, K, L, M, N, O, P | 100             |
| Mobulidae    | <i>Mobula mobular</i> *            | (Bonnaterre, 1788)                         | Giant devilray         | EN                 | NA               | EN              | A, B, C, D, E, F, G, H, I, J, K, L, M, N, O, P | 100             |
| Myliobatidae | <i>Myliobatis aquila</i>           | (Linnaeus, 1758)                           | Common eagle ray       | DD                 | VU               | VU              | A, B, C, D, E, F, G, H, I, J, K, L, M, N, O, P | 100             |
| Myliobatidae | <i>Pteromylaeus bovinus</i>        | (Geoffroy Saint-Hilaire, 1817)             | Bullray                | DD                 | CR               | CR              | A, B, C, D, E, F, G, H, I, J, K, L, M, N, O, P | 100             |

(Continued)

Table 2. (Continued)

| Rhinopteridae | <i>Rhinoptera marginata</i>   | (Geoffroy Saint-Hilaire, 1817) | Lusitanian cownose ray | NT                 | DD               | DD              | A, B, C, D, E, F, G, H, I, J, K, L, M, N, O, P | 100             |
|---------------|-------------------------------|--------------------------------|------------------------|--------------------|------------------|-----------------|------------------------------------------------|-----------------|
| Pristidae     | <i>Pristis pectinata</i> §    | Latham, 1794                   | Smalltooth sawfish     | CR                 | CR               | CR              | D, E, F, G, H, K, L, M, P                      | 56.25           |
| Pristidae     | <i>Pristis pristis</i> §      | (Linnaeus, 1758)               | Common sawfish         | CR                 | CR               | CR              | D, E, G, L, P                                  | 31.25           |
| Rajidae       | <i>Dipturus batis</i>         | (Linnaeus, 1758)               | Common skate           | CR                 | CR               | CR              | A, D, E, G, J, K, L, O, P                      | 56.25           |
| Rajidae       | <i>Dipturus nidarosiensis</i> | (Storm, 1881)                  | Norwegian skate        | NT                 | NA               | NA              | G                                              | 6.25            |
| Rajidae       | <i>Dipturus oxyrinchus</i>    | (Linnaeus, 1758)               | Sharpnose skate        | NT                 | NA               | NT              | A, B, C, D, E, F, G, H, I, J, K, L, M, N, O, P | 100             |
| Family        | Genus + Species               | Authority                      | Vernacular Name        | IUCN Region Global | IUCN Region Euro | IUCN Region MED | UGOs occurrence                                | % of occurrence |
| Rajidae       | <i>Leucoraja circularis</i>   | (Couch, 1838)                  | Sandy skate            | EN                 | NA               | CR              | A, C, D, E, G, I, K, L, N, O, P                | 68.75           |
| Rajidae       | <i>Leucoraja fullonica</i>    | (Linnaeus, 1758)               | Shagreen skate         | VU                 | NA               | CR              | A, D, E, F, G, H, J, K, L, N, O, P             | 75              |
| Rajidae       | <i>Leucoraja melitensis</i>   | Clark, 1926                    | Maltese skate          | CR                 | NA               | NA              | A, D, G, I, J, N                               | 37.5            |
| Rajidae       | <i>Leucoraja naevus</i>       | (Müller & Henle, 1841)         | Cuckoo skate           | LC                 | NA               | NT              | A, B, D, E, F, G, H, I, J, K, L, N, O          | 81.25           |
| Rajidae       | <i>Raja africana</i>          | Capepe, 1977                   | African skate          | NA                 | NA               | NA              | N                                              | 6.25            |
| Rajidae       | <i>Raja asterias</i>          | Delaroche, 1809                | Atlantic starry skate  | NT                 | NA               | NT              | A, B, C, D, E, F, G, H, I, J, K, L, M, N, O, P | 100             |
| Rajidae       | <i>Raja brachyura</i>         | Lafont, 1871                   | Blonde skate           | NT                 | NT               | NT              | A, D, E, G, J, K, L, N                         | 50              |
| Rajidae       | <i>Raja clavata</i>           | Linnaeus, 1758                 | Thornback skate        | NT                 | NT               | NT              | A, B, C, D, E, F, G, H, I, J, K, L, M, N, O, P | 100             |
| Rajidae       | <i>Raja miraletus</i>         | Linnaeus, 1758                 | Twineye skate          | LC                 | LC               | LC              | A, B, C, D, E, F, G, H, I, J, K, L, M, N, O, P | 100             |
| Rajidae       | <i>Raja montagui</i>          | Fowler, 1910                   | Spotted skate          | LC                 | LC               | LC              | A, C, D, E, G, H, I, K, L, N, O, P             | 75              |
| Rajidae       | <i>Raja polystigma</i>        | Regan, 1923                    | Speckled skate         | LC                 | NA               | NA              | A, D, E, G, I, K, L, N, O, P                   | 62.5            |
| Rajidae       | <i>Raja rádula</i>            | Delaroche, 1809                | Rough skate            | EN                 | NA               | NA              | A, B, C, D, E, F, G, H, I, J, L, M, N, O, P    | 93.75           |
| Rajidae       | <i>Raja undulata</i>          | Lacepède, 1802                 | Undulate skate         | EN                 | NT               | NT              | A, D, E, F, G, H, K, L, N, O, P                | 68.75           |
| Rajidae       | <i>Rostroraja alba</i>        | (Lacepède, 1803)               | White skate            | EN                 | CR               | EN              | A, D, E, G, I, J, K, L, N, O, P                | 68.75           |
| Rhinobatidae  | <i>Rhinobatos cemiculus</i>   | Geoffroy Saint-Hilaire, 1817   | Blackchin guitarfish   | EN                 | EN               | EN              | A, B, C, D, E, F, G, H, I, J, K, L, M, N, O, P | 100             |
| Rhinobatidae  | <i>Rhinobatos rhinobatos</i>  | (Linnaeus, 1758)               | Common guitarfish      | EN                 | EN               | EN              | A, B, C, D, E, F, G, H, I, J, K, L, M, N, O, P | 100             |
| Torpedinidae  | <i>Torpedo marmorata</i>      | Risso, 1810                    | Spotted torpedo ray    | DD                 | LC               | LC              | A, B, C, D, E, F, G, H, I, J, K, L, M, N, O, P | 100             |

(Continued)



Table 2. (Continued)

| Family       | Genus + Species               | Authority        | Vernacular Name       | IUCN Region Global | IUCN Region Euro | IUCN Region MED | UGOs occurrence                                | % of occurrence |
|--------------|-------------------------------|------------------|-----------------------|--------------------|------------------|-----------------|------------------------------------------------|-----------------|
| Torpedinidae | <i>Torpedo nobiliana</i>      | Bonaparte, 1835  | Great torpedo ray     | DD                 | LC               | LC              | A, B, C, D, E, F, G, H, I, J, K, L, M, N, O, P | 100             |
| Torpedinidae | <i>Torpedo sinuspersici</i> ~ | Olfers, 1831     | Variable torpedo ray  | DD                 | NA               | NA              | M                                              | 6.25            |
| Torpedinidae | <i>Torpedo torpedo</i>        | (Linnaeus, 1758) | Ocellate torpedo ray  | DD                 | LC               | LC              | A, B, C, D, E, F, G, H, I, J, K, L, M, N, O, P | 100             |
| Chimaeridae  | <i>Chimaera monstrosa</i>     | Linnaeus, 1758   | Rabbitfish            | NT                 | NT               | NT              | A, B, D, E, G, H, J, K, L, M, N, O, P          | 81.25           |
| Chimaeridae  | <i>Hydrolagus mirabilis</i> § | (Collett, 1904)  | Large-eyed rabbitfish | NT                 | LC               | NA              | M                                              | 6.25            |

<https://doi.org/10.1371/journal.pone.0175699.t002>

*mirabilis*). Annex (see S1 Table) shows the list of species by OGU, including their habitat (pelagic or demersal). The average number of Chondrichthyes observed species by OGU is 66. Of the Chondrichthyes species from the Mediterranean Sea, 57 species were assessed in the IUCN Red List of Threatened Species [25].

In the Mediterranean Sea, a total of 41 species of Chondrichthyes are found in all the 16 OGUs. Of these 41 species, 25 are sharks and 16 are Batoidea.

A significant negative correlation between CSR and the longitude of the centroid of each OGU (LON) ( $r = -0.822$ ;  $P < 0.001$ ) was found, but the highest correlation was observed with the distance to the Strait of Gibraltar (see Table 4). If Lessepsian, vagrant, visitors, and highly migratory species of Chondrichthyes previously mentioned are removed from the analysis, taken together and separately, similar results were obtained (Table 4).

**Table 3. Independent variables used in this study for each Operational Geographical Unit (OGU).** Key: LAT, latitude (degrees); LON, longitude (degrees); OAR, the OGU area (km<sup>2</sup>); DISTG, distance from the centroid of each OGU to the Strait of Gibraltar (km); DISTS, distance from the centroid of each OGU to the Suez Canal(km); SST, sea surface temperature (°C); SD, salinity in depth (PSU); FAM, number of taxonomic families of bony fishes for each OGU.

| UGOs | LON   | LAT   | OAR       | DISTG   | DISTS  | SST   | SD    | FAM |
|------|-------|-------|-----------|---------|--------|-------|-------|-----|
| A    | 3.14  | 37.10 | 126138.67 | 712.62  | 2522.6 | 19.61 | 38.11 | 139 |
| B    | 33.50 | 34.39 | 44932.56  | 3225.50 | 408.3  | 22.25 | 38.76 | 100 |
| C    | 29.82 | 32.62 | 261633.71 | 2945.68 | 270.5  | 21.95 | 38.78 | 127 |
| D    | 6.61  | 42.52 | 87910.26  | 1235.27 | 2518.4 | 17.62 | 38.41 | 134 |
| E    | 24.10 | 36.83 | 407799.36 | 2441.00 | 970.6  | 19.93 | 38.84 | 141 |
| F    | 34.62 | 32.48 | 7781.85   | 3341.64 | 248.1  | 23.10 | 38.91 | 156 |
| G    | 12.91 | 38.94 | 538842.39 | 1548.34 | 1862.1 | 19.60 | 38.54 | 154 |
| H    | 35.05 | 33.85 | 14336.88  | 3358.43 | 400.4  | 22.76 | 38.79 | 107 |
| I    | 18.70 | 33.18 | 363869.95 | 2024.93 | 1153.9 | 21.31 | 38.68 | 101 |
| J    | 14.40 | 35.74 | 26770.88  | 1636.75 | 1586.3 | 20.12 | 38.67 | 128 |
| K    | -3.76 | 35.59 | 22541.21  | 147.01  | 3036.8 | 18.77 | 38.33 | 135 |
| L    | 2.15  | 39.19 | 252105.06 | 719.00  | 2680.3 | 19.13 | 38.41 | 145 |
| M    | 35.45 | 35.22 | 10501.72  | 3381.54 | 561.4  | 22.61 | 38.78 | 117 |
| N    | 11.44 | 34.77 | 128629.12 | 1391.91 | 1730.6 | 19.92 | 38.16 | 117 |
| O    | 31.15 | 36.00 | 112061.71 | 3023.94 | 599.7  | 21.16 | 38.79 | 141 |
| P    | 16.05 | 42.71 | 137504.35 | 1928.50 | 1918.7 | 18.30 | 38.55 | 58  |

<https://doi.org/10.1371/journal.pone.0175699.t003>

**Table 4. Pearson correlation coefficient between the independent variables used in this study for each Operational Geographical Unit (OGU), and dependent variables: Chondrichthyes species Richness (CSR), Chondrichthyes species Richness without Lessepsian invasive species (LCSR); Chondrichthyes species Richness without vagrant and visitors (VCSR); Chondrichthyes species Richness without highly migratory species (HCSR); Chondrichthyes species Richness without Lessepsian invasive species, highly migratory species, vagrant and visitors together (ALLCSR).** Pearson correlation coefficient is shown (significance in brackets). Key: LAT, latitude (degrees); LON, longitude (degrees); OAR, the OGU area (km<sup>2</sup>); DISTG, distance from the centroid of each OGU to the Strait of Gibraltar (km); DISTS, distance from the centroid of each OGU to the Suez Canal (km); SST, sea surface temperature (°C); SD, salinity in depth (PSU); FAM, number of taxonomic families of bony fishes per OGU. \*\* Significant correlation.

|        | LON                  | LAT                | OAR              | DISTG                | DISTS               | SST                  | SD                  | FAM              |
|--------|----------------------|--------------------|------------------|----------------------|---------------------|----------------------|---------------------|------------------|
| CSR    | -0.822**<br>(<0.001) | 0.489<br>(0.055)   | 0.423<br>(0.103) | -0.824**<br>(<0.001) | 0.804**<br>(<0.001) | -0.736**<br>(0.001)  | -0.738**<br>(0.001) | 0.463<br>(0.071) |
| LCSR   | -0.845**<br>(<0.001) | 0.539**<br>(0.031) | 0.430<br>(0.096) | -0.846**<br>(<0.001) | 0.833**<br>(<0.001) | -0.781**<br>(<0.001) | -0.752**<br>(0.001) | 0.406<br>(0.119) |
| VCSR   | -0.804**<br>(<0.001) | 0.425<br>(0.1)     | 0.368<br>(0.161) | -0.809**<br>(<0.001) | 0.77**<br>(<0.001)  | -0.710**<br>(0.002)  | -0.744**<br>(0.001) | 0.443<br>(0.086) |
| HCSR   | -0.773**<br>(<0.001) | 0.508**<br>(0.045) | 0.442<br>(0.087) | -0.774**<br>(<0.001) | 0.76**<br>(<0.001)  | -0.726**<br>(0.001)  | -0.690**<br>(0.003) | 0.452<br>(0.076) |
| ALLCSR | -0.82**<br>(<0.001)  | 0.496<br>(0.051)   | 0.387<br>(0.139) | -0.823**<br>(<0.001) | 0.797**<br>(<0.001) | -0.763**<br>(0.001)  | -0.758**<br>(0.001) | 0.370<br>(0.159) |

<https://doi.org/10.1371/journal.pone.0175699.t004>

The best model selected for the Chondrichthyes Species Richness (CSR) in the Mediterranean Sea, according to  $R^2$  and F values, was a multiple linear model between CSR, as a dependent variable, and DISTG and FAM as explanatory variables ( $R^2$  adjusted = 0.746; F = 22.996;  $P < 0.001$ ). The model is shown as follows (order of variables in the model related to their weight according to  $\beta$  value):

$$CSR = 65.296 - 0.006 \times DISTG + 0.113 \times FAM$$

If Lessepsian, vagrant, visitors, and highly migratory species of Chondrichthyes previously mentioned are removed from the analysis, taken together and separately, then DISTG was the only or the most explanatory variable (Table 5). The number of species in the Eastern Mediterranean region might have increased recently due to Lessepsian migration of species of the group considered here. By discarding the Lessepsian species, the linear model between species richness and dependent variables improved its fitting ( $R^2$  adjusted for LCSR = 0.766 vs.  $R^2$  adjusted for CSR = 0.746).

## Discussion

According to our results, the best explanatory variables of CSR distribution are the distance from the centroid of each OGU to the Strait of Gibraltar (DISTG) and the number of taxonomic families of bony fishes in each OGU. Moreover, if Lessepsian, vagrant, visitors, and

**Table 5. Results of the multiple lineal regression models among Chondrichthyes Species Richness (CSR) excluding only Lessepsian (LCSR), only vagrant, visitors (VCSR), and only highly migratory species of Chondrichthyes previously mentioned (HCSR), and excluding all of them pooled together (ALLCSR) versus historical, ecological and environmental factors.** Key: DISTG, distance from the centroid of each OGU to the Strait of Gibraltar (km); OAR, the OGU area (km<sup>2</sup>).

|        | $R^2$ adjusted | F-Fisher | P of the model | Variables in the model |
|--------|----------------|----------|----------------|------------------------|
| LCSR   | 0.766          | 25.547   | <0.001         | DISTG; OAR             |
| VCSR   | 0.631          | 26.661   | <0.001         | DISTG                  |
| HCSR   | 0.570          | 20.906   | <0.001         | DISTG                  |
| ALLCSR | 0.654          | 29.322   | <0.001         | DISTG                  |

<https://doi.org/10.1371/journal.pone.0175699.t005>

highly migratory species of Chondrichthyes previously mentioned are removed from the analysis, taken together and separately, then DISTG is the most important variable in all the cases.

Thus, two possible explanatory hypotheses could support this geographical distribution in CSR: *Historical causes* (i.e., extinction followed by a recolonization process and a “peninsula effect”), and *the Mediterranean Sea as an ecological sink*. Due to the Messinian salinity crisis aforementioned, the Mediterranean suffered almost total desiccation, becoming extinct many of the marine species; some of them recolonizing the Mediterranean Sea once opened and refilled again with Atlantic waters [7]. This could explain the low level of endemism of Chondrichthyes in the Mediterranean Sea [9,14]. Thus, our results suggest that this event has left a mark on the species richness distribution pattern. This pattern is consistent with the hypothesis of the extinction-recolonization process of the Mediterranean Sea by Chondrichthyes from the Atlantic Ocean. This process could persist at present by the “peninsula effect” caused by the role of the Strait of Gibraltar as an isthmus for the entrance of the species to the Mediterranean Sea, making the proximities of the Strait of Gibraltar more accessible to the Atlantic species. Consequently, the Messinian crisis and the geographical structure of the Mediterranean Sea as a marine peninsula, could be the main drivers of the longitudinal gradient of CSR reported before [13], and similarly to the gradient of species richness found in terrestrial peninsulas from the isthmus to the furthestmost edge [3–5].

The other explanation for this longitudinal gradient could be related to the possible role of the Mediterranean Sea as an ecological sink. With regard to this hypothesis, when modeling CRS by removing from the analysis the highly migratory species from the Mediterranean Sea (this species set could be mainly affected by the ecological sink effect) a similar model was obtained (to see Table 4). Therefore, the basis of the ecological sink hypothesis does not explain properly the Mediterranean CSR.

With regard to the other ecological and environmental factors, distance from the centroid of each OGU to the Suez Canal (DISTS), latitude (LAT), salinity in depth (SD), and sea surface temperature (SST), the relation observed was in some or all cases significant. However, in all cases, CSR was best correlated with DISTG than with the other variables (to see Table 4). This suggests that the correlation between CSR and the other variables is based on the DISTG-CSR relationship.

Latitude is only correlated with CSR, without considering Lessepsian species (LCSR) and highly migratory species (HCSR). However, latitude is related to longitude, as the easternmost OGUs are also the southernmost ones and, consequently, the most outlying areas to the Strait of Gibraltar.

The second variable used in the multivariate model was the number of taxonomic families of bony fishes per OGU (FAM), showing a positive relation with CSR. FAM summarized the availability of different prey types at each OGU, suggesting that CSR is also affected by some ecological processes.

In conclusion, the extinction-recolonization process, the “peninsula effect”, and the availability of preys altogether, constitute the main historical and ecological factors that could explain the current distribution of Chondrichthyes species in the Mediterranean Sea.

## Supporting information

**S1 Table. Checklist of Chondrichthyes species recorded in the Mediterranean Sea, and occurrence for each Operational Geographical Units (OGUs) and reference notes.** According to the synonyms, accepted names from Fishbase were used [21]. (XLSX)

## Acknowledgments

Comments from Dr. Mohamed Nejmeddine Bradai and Dr. Sergio Ragonese improved a previous version.

## Author Contributions

**Conceptualization:** JCB.

**Data curation:** MJM JMSQ.

**Formal analysis:** MJM JCB.

**Funding acquisition:** DM.

**Methodology:** JCB RR.

**Validation:** RR.

**Writing – original draft:** MJM JCB JAC ILF.

**Writing – review & editing:** JMSQ JAC ILF RR DM.

## References

1. Real R. Las tendencias geográficas de la riqueza específica. In: Vargas JM, Real R, Antúnez A, editors. *Objetivos y métodos biogeográficos. Aplicaciones en Herpetología. Monografías de Herpetología n° 2*. Valencia: Asociación Herpetológica Española; 1992. pp. 85–94.
2. Gray JS. Marine diversity: the paradigms in patterns of species richness examined. *Sci Mar*. 2001; 65 (supplement 2): 41–56.
3. Taylor RJ, Regal PJ. The Peninsular Effect on Species Diversity and the Biogeography of Baja California. *Am Nat*. 1978; 112(985): 583–593.
4. Busack SD, Hedges SB. Is the peninsular effect a red herring? *Am Nat*. 1984; 123 (2): 266–275.
5. Battisti C. Peninsular patterns in biological diversity: historical arrangement, methodological approaches and causal processes. *J Nat Hist*. 2014; 48 (43–44): 2701–2732.
6. Rodríguez J. *Oceanografía del mar Mediterráneo*. Barcelona: Pirámide; 1982.
7. Hsü KJ, Montadert L, Bernoulli D, Bianca M, Erickson A, Garrison RE, et al. History of the Mediterranean salinity crisis. *Nature*. 1977; 267: 399–403.
8. Garcia-Castellanos D, Estrada F, Jiménez-Munt C, Gorini C, Fernández M, Vergés J, et al. Catastrophic flood of the Mediterranean after the Messinian salinity crisis. *Nature*. 2009; 462: 778–781. <https://doi.org/10.1038/nature08555> PMID: 20010684
9. Cavanagh RD, Gibson C. Overview of the Conservation Status of Cartilaginous Fishes (Chondrichthyes) in the Mediterranean Sea. Gland: International Union for Conservation of Nature; 2007.
10. García Núñez NE. Tiburones: conservación, pesca y comercio internacional. Madrid: Ministerio de Medio Ambiente, y Medio Rural y Marino; 2008.
11. Baum JK, Myers RA, Kehler DG, Worm B, Harley SJ, Doherty PA. Collapse and Conservation of Shark Populations in the Northwest Atlantic. *Science*. 2003; 299: 389–392. <https://doi.org/10.1126/science.1079777> PMID: 12532016
12. Dulvy NK, Fowler SL, Musick JA, Cavanagh RD, Kyne PM, Harrison LR, et al. Extinction risk and conservation of the world's sharks and rays. *eLife*. 2008; 3: e00590.
13. Coll M, Piroddi C, Steenbeek J, Kaschner K, Ben Rais Lasram F, Aguzzi J, et al. (2010) The Biodiversity of the Mediterranean Sea: Estimates, Patterns, and Threats. *PLoS ONE*. 2010; 5(8): e11842. <https://doi.org/10.1371/journal.pone.0011842> PMID: 20689844
14. Serena F. Field identification guide to the sharks and rays of the Mediterranean and Black Sea. FAO Species Identification Guide for Fisheries Purpose. Rome: Food and Agriculture Organization of the United Nations; 2005.
15. Mancini PL, Pillans RD, Amorim AF, Gonzalez M, Anderson C. *Carcharhinus altimus*. The IUCN Red List of Threatened Species 2015: e.T161564A48941657. 2015 [cited 2015 Oct 23].

16. Saad A, Ali M, Seret B. Liste commentée des chondrichthyens de Syrie (Méditerranée orientale). Rapp. Comm. int. Mer Médit. 2004; 37: 430.
17. Bradai MN, Saidi B, Enajjar S. Elasmobranchs of the Mediterranean and Black sea: status, ecology and biology. Bibliographic analysis. Studies and Reviews. General Fisheries Commission for the Mediterranean. Rome: Food and Agriculture Organization of the United Nations; 2012.
18. Hassan M. Occurrence of large-eyed rabbitfish *Hydrolagus mirabilis*, Chimaeridae, in Syrian waters (eastern Mediterranean). Mar Biodivers Rec. 2013.
19. Crovello TJ. Quantitative biogeography: an overview. Taxon. 1981; 30: 563–575.
20. Macías D, Meléndez MJ. Establishing an informative (sampling) network for the assessment of stock status of shark: a review. In: Basusta N, Keski Ç, Serena F, Seret B, editors. Proceeding of the International Workshop on Mediterranean Cartilaginous Fish with Emphasis on South–East. Istanbul: Turkish Marine Research Foundation; 2005. pp. 194–201.
21. Froese R, Pauly D. FishBase. 2015 [cited 15 May 2015]. In: [Internet]. <https://www.fishbase.org>.
22. Lipej L, Dulčić J. Checklist of the Adriatic Sea Fishes. Zootaxa 2010; 2589: 1–92.
23. Bilecenoglu M, Taskavak E, Mater S, Kaya M. Checklist of the marine fishes of Turkey. Zootaxa 2002; 113: 1–194.
24. Tobuni IM, Benabdallah BR, Serena F, Shakman EA. First documented presence of *Galeocerdo cuvier* (Péron & Lesueur, 1822) (Elasmobranchii, Carcharhinidae) in the Mediterranean basin (Libyan waters). Mar Biodivers Rec. 2016; 9: 94.
25. The IUCN Red List of Threatened Species. 2017 [cited 2017 Jan 14]. In: [Internet]. <https://www.iucnredlist.org>
26. Legendre P. Spatial autocorrelation: trouble or new paradigm? Ecology 1993; 74: 1659–1673.
27. Romero D, Olivero J, Brito JC, Real R. Comparison of approaches to combine species distribution models based on different sets of predictors. Ecography 2015; 38: 1–11.
28. Zar JH. Biostatistical analysis. New Jersey: Prentice-Hall; 1996.
29. NOAA (National Oceanic and Atmospheric Administration). [cited 2016 Jan 14]. Database: [Internet]. <https://www.nodc.noaa.gov/>
30. Shark Species Group Intersessional (2016). Report of the 2016 intersessional meeting of the shark species group, Madeira, Portugal–April 25 to 29, [cited 2017 Jan 14]. Repositories ICCAT [Internet]. [https://www.iccat.int/Documents/Meetings/Docs/2016\\_SHK\\_REPORT\\_ENG.pdf](https://www.iccat.int/Documents/Meetings/Docs/2016_SHK_REPORT_ENG.pdf).
